# Supplementary material for: Psychometric Reliability to Assess the Perception of Women's Fulfillment of Maternity Rights
Source: Preprints.org preprint supplement (doi:10.20944/preprints202407.1078.v1), 2024-07-12
Supplement: Supplementary file 1 [file supplementary]

**Table S1**. The original items of fulfillment in maternity rights instrument and exclusion criteria by exploratory factor analysis and principal component analysis.

| **Item** | **Sentence** | **Motive to be excluded** |
| --- | --- | --- |
| **I1** | Tuvo información suficiente y clara sobre los cuidados y procedimientos de salud que debía tener hacía usted y el recién nacido, para un embarazo sano y eficaz  *Durante el embarazo* |  |
| **I2** | Tuvo información suficiente y clara sobre los cuidados y procedimientos de salud que debía tener hacía usted y el recién nacido, para un parto/cesárea eficaz  *Durante el parto* |  |
| **I3** | Tuvo información suficiente y clara sobre los cuidados y procedimientos de salud que debía tener hacía usted y el recién nacido, para un posparto sano  *Durante el postparto* |  |
| **I4** | Tuvo información suficiente y clara sobre las gestiones administrativas que usted debía hacer para garantizar su atención médica *Durante el embarazo* |  |
| **I5** | Tuvo información suficiente y clara sobre las gestiones administrativas que usted debía hacer para garantizar su atención médica *Durante el parto* |  |
| **I6** | Tuvo información suficiente y clara sobre las gestiones administrativas que usted debía hacer para garantizar su atención médica *Durante el postparto* |  |
| **I7** | Tuvo información suficiente y clara sobre los procedimientos médicos que le realizaron *Durante el embarazo* |  |
| **I8** | Tuvo información suficiente y clara sobre los procedimientos médicos que le realizaron *Durante el parto* | Initial EFA. Complexity >1.9 |
| **I9** | Tuvo información suficiente y clara sobre los procedimientos médicos que le realizaron *Durante el postparto* |  |
| **I10** | Los profesionales de salud le brindaron información clara y suficiente sobre los métodos de anticoncepción (quirúrgicos, de barrera u hormonales) disponibles para su planificación familiar *Durante el embarazo y/o posparto* | Initial PCA. Factor loading <0.3 |
| **I11** | Tuvo información suficiente y clara para iniciar y mantener la lactancia materna de forma correcta y no dolorosa *Durante el postparto* |  |
| **I12** | Le solicitaron su consentimiento/autorización verbal para los procesos de atención médica que implicaban la invasión de su cuerpo (tactos vaginales o ecografías)  *Durante el embarazo* | Initial EFA. Complexity >1.9 |
| **I13** | Le solicitaron su consentimiento/autorización verbal para los procesos de atención médica que implicaban la invasión de su cuerpo (corte en el perineo o ecografías)  *Durante el parto* |  |
| **I14** | Le solicitaron su consentimiento/autorización verbal para los procesos de atención médica que implicaban la invasión de su cuerpo (curas, ligadura de trompas o ecografías) *Durante el postparto* | Initial EFA. Complexity >1.9 |
| **I15** | Le solicitaron su consentimiento/autorización escrita para los procesos de atención médica que implicaban la invasión de su cuerpo (tactos vaginales o ecografías)  *Durante el embarazo* |  |
| **I16** | Le solicitaron su consentimiento/autorización escrita para los procesos de atención clínica que implicaban la invasión de su cuerpo (corte en el perineo o ecografías)  *Durante el parto* |  |
| **I17** | Le solicitaron su consentimiento/autorización escrita para los procesos de atención clínica que implicaban la invasión de su cuerpo (curas, ligadura de trompas o ecografías) *Durante el postparto* |  |
| **I18** | Respetaron sus decisiones sobre el curso de su tratamiento clínico (la fecha de programación de cesárea, entre otras) *Durante el embarazo* | Initial EFA. Complexity >1.9 |
| **I19** | Respetaron sus decisiones sobre el curso de su tratamiento clínico (aceleración del parto, el tipo de parto –vaginal o cesárea, entre otras) *Durante el parto* | Initial EFA. Complexity >1.9 |
| **I20** | Respetaron sus decisiones sobre el curso de su tratamiento clínico (ligadura de trompas, entre otras) *Durante el postparto* | Initial EFA. Complexity >1.9 |
| **I21** | Respetaron sus decisiones en conductas de cuidado propio y del recién nacido que no eran de riesgo para ninguno de los dos *Durante el embarazo* | Initial EFA. Complexity >1.9 |
| **I22** | Respetaron sus decisiones en conductas de cuidado propio y del recién nacido que no eran de riesgo para ninguno de los dos *Durante el parto* |  |
| **I23** | Respetaron sus decisiones en conductas de cuidado propio y del recién nacido que no eran de riesgo para ninguno de los dos (tipo de anticoncepción, tipo de lactancia -materna o de fórmula-, entre otros) *Durante el postparto* |  |
| **I24** | Los profesionales e instituciones de salud solicitaron y brindaron los procesos, recursos y servicios de atención médica necesarios para garantizar su salud física y mental, y la de su recién nacido (remitir a otros profesionales, o tratamientos necesarios para su salud) *Durante el embarazo* | Initial EFA. Complexity >1.9 |
| **I25** | Los profesionales e instituciones de salud solicitaron y brindaron los procesos, recursos y servicios de atención médica necesarios para garantizar su salud física y mental, y la de su recién nacido *Durante el parto* | Initial EFA. Complexity >1.9 |
| **I26** | Los profesionales e instituciones de salud solicitaron y brindaron los procesos, recursos y servicios de atención médica necesarios para garantizar su salud física y mental, y la de su recién nacido (remitir a otros profesionales o tratamientos necesarios para su salud) *Durante el postparto* | Initial EFA. Complexity >1.9 |
| **I27** | En el caso de haber solicitado el apoyo familiar o acompañamiento durante la atención médica, le permitieron el acceso a su acompañante. *Si nunca lo solicitó marque la opción «4»*. *Durante el embarazo* |  |
| **I28** | En el caso de haber solicitado el apoyo familiar o acompañamiento durante la atención médica, le permitieron el acceso a su acompañante. *Si nunca lo solicitó marque la opción «4»*. *Durante el parto* |  |
| **I29** | En el caso de haber solicitado el apoyo familiar o acompañamiento durante la atención médica, le permitieron el acceso a su acompañante. *Si nunca lo solicitó marque la opción «4»*. *Durante el postparto* |  |
| **I30** | Los profesionales de salud realizaron o le permitieron acciones para el control de su dolor (medicación, entre otras) *Durante el embarazo* | Initial PCA. Factor loading <0.3 |
| **I31** | Los profesionales de salud realizaron o le permitieron acciones para el control de su dolor (medicación, aplicación de compresas, o admitirle deambular, control postural) *Durante el parto* |  |
| **I32** | Los profesionales de salud realizaron o le permitieron acciones para el control de su dolor (medicación, aplicación de compresas, entre otros) *Durante el postparto* |  |
| **I33** | Los profesionales que le atendieron le maltrataron físicamente *Durante el parto* | Initial EFA. Complexity >1.9 |
| **I34** | En la atención médica, fueron protegidos sus derechos (como el derecho a la vida, la libertad, la salud y protección social-económica-cultural, la igualdad, entre otros)  *Durante el postparto* | Initial EFA. Complexity >1.9 |
| **I35** | Durante la atención médica escucharon sus sentimientos, emociones, dudas y opiniones *Durante el embarazo* |  |
| **I36** | Durante la atención médica escucharon sus sentimientos, emociones, dudas y opiniones *Durante el parto* |  |
| **I37** | Durante la atención médica escucharon sus sentimientos, emociones, dudas y opiniones *Durante el postparto* |  |
| **I38** | Las personas que le atendieron mantuvieron una comunicación respetuosa y motivadora hacia usted y su maternidad *Durante el embarazo* | Initial EFA. Complexity >1.9 |
| **I39** | Las personas que le atendieron mantuvieron una comunicación respetuosa y motivadora hacia usted y su maternidad *Durante el parto* | Initial EFA. Complexity >1.9 |
| **I40** | Las personas que le atendieron mantuvieron una comunicación respetuosa y motivadora hacia usted y su maternidad *Durante el postparto* | Initial EFA. Complexity >1.9 |
| **I41** | Si presentó dificultades para pagar los servicios de salud en una hospitalización, fue retenida por la institución hasta realizar el pago completo. *De no haber tenido dificultad para el pago o no haber estado hospitalizada, seleccione la opción «4»*.  *Durante el parto* | Initial PCA. Factor loading <0.3 |
| **I42** | Su privacidad o evitar la exposición de su cuerpo (cubrir partes íntimas, regular la exhibición de su cuerpo a persona no implicadas en el tratamiento), fue respetada durante la atención médica  *Durante el embarazo* |  |
| **I43** | Su privacidad o evitar la exposición de su cuerpo (cubrir partes íntimas, regular la exhibición de su cuerpo a persona no implicadas en el tratamiento), fue respetada durante la atención médica  *Durante el parto* | Initial EFA. Complexity >1.9 |
| **I44** | Su privacidad o evitar la exposición de su cuerpo (cubrir partes íntimas, regular la exhibición de su cuerpo a persona no implicadas en el tratamiento), fue respetada durante la atención médica  *Durante el postparto* | Initial EFA. Complexity >1.9 |
| **I45** | La confidencialidad de la información sobre su estado de salud fue conservada durante la atención médica *Durante el embarazo* |  |
| **I46** | La confidencialidad de la información sobre su estado de salud y el de su recién nacido, fue conservada durante la atención médica *Durante el parto* |  |
| **I47** | La confidencialidad de la información sobre su estado de salud y el de su recién nacido, fue conservada durante la atención médica *Durante el postparto* |  |
| **I48** | Considera que alguna práctica de atención médica que le realizaron pudo ser molesta e innecesaria a la vez (aplicación de intervenciones -subirse sobre el abdomen para empujar al recién nacido hacia el canal del parto-, entre otras) *Durante el parto* | Initial EFA. Complexity >1.9 |
| **I49** | Considera que alguna práctica de atención médica que le realizaron pudo ser molesta e innecesaria a la vez (aplicación de curas, entre otras) *Durante el postparto* |  |
| **I50** | Si sus derechos fueron vulnerados durante la atención médica, considera que los defendió. *En el caso que sus derechos no hayan sido vulnerados, responda la opción «4»*. *Durante el parto* |  |

**Figure S1**. The corplot by Spearman´s rho coefficient of the original items of FMR instrument.


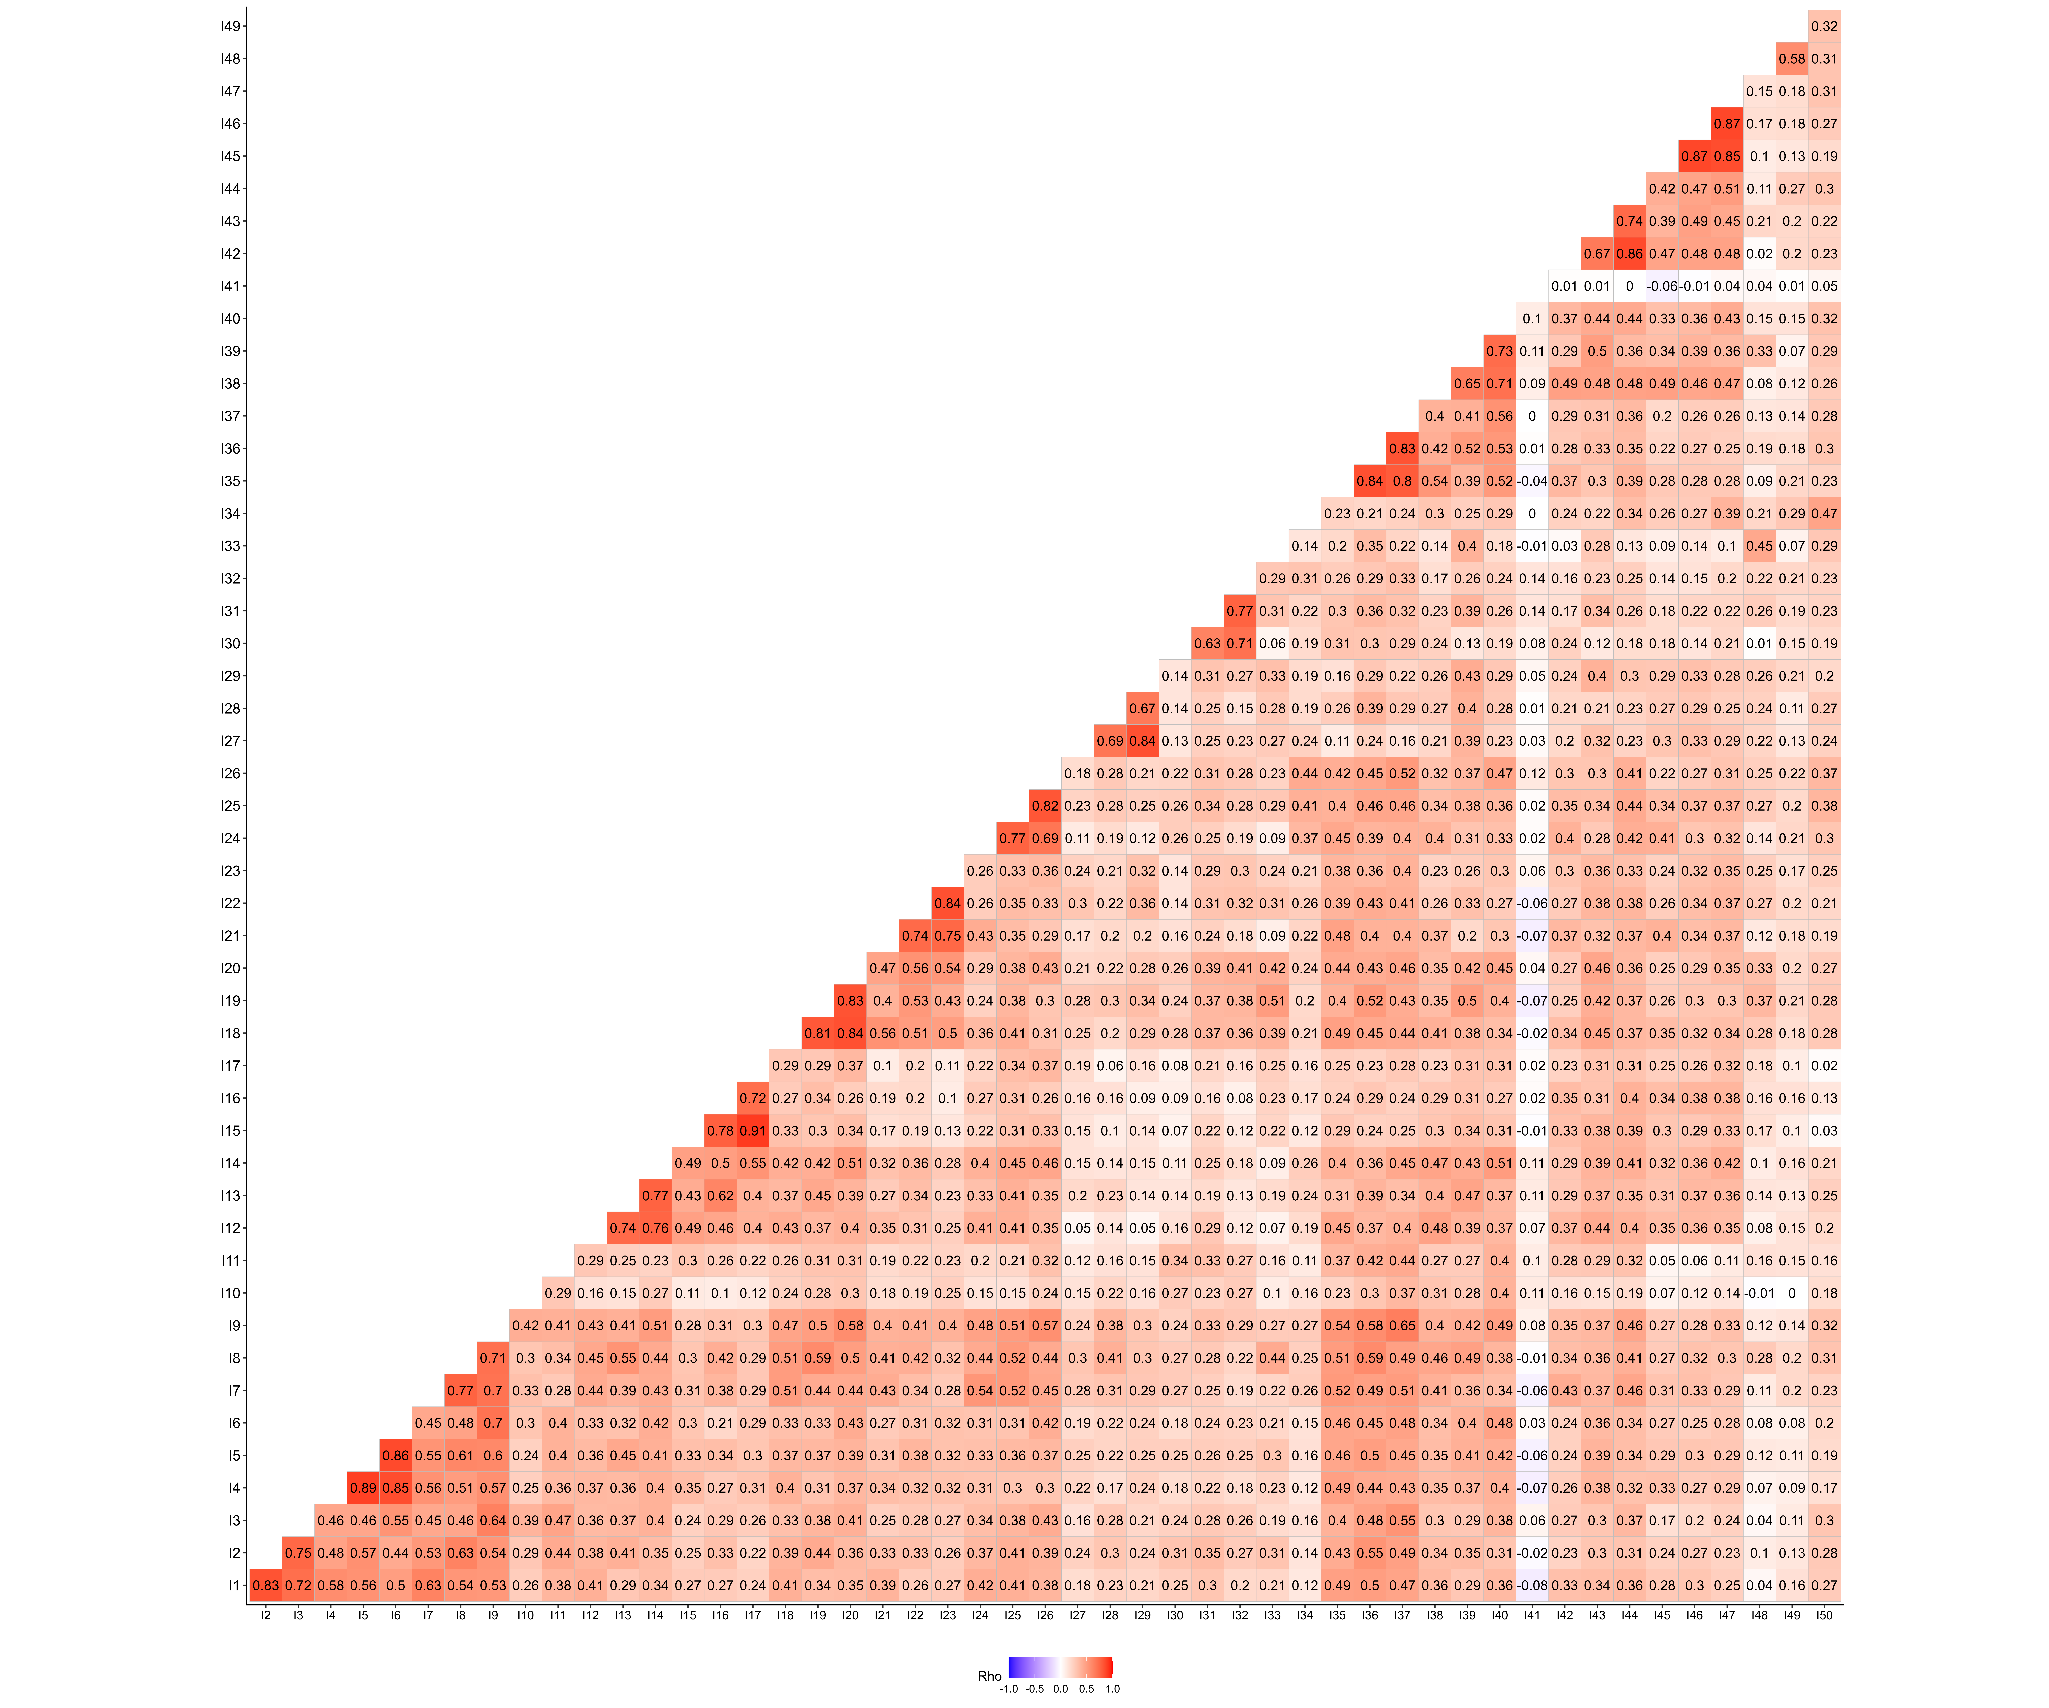


**Table S2**. Factor loading and complexity of the original of FMR instrument.

| **Item** | **Factor 1** | **Factor 2** | **Factor 3** | **Factor 4** | **Factor 5** | **Factor 6** | **Factor 7** | **Com** | **Exclusion** |
| --- | --- | --- | --- | --- | --- | --- | --- | --- | --- |
| **I1** | 0.25 | 0.52 | 0.20 | 0.35 |  |  |  | 1.3 |  |
| **I2** | 0.17 | 0.45 | 0.35 | 0.34 |  |  | 0.10 | 1.4 |  |
| **I3** | 0.17 | 0.44 | 0.26 | 0.33 |  |  |  | 1.3 |  |
| **I4** | 0.17 | 0.91 |  | 0.16 | 0.13 |  |  | 1.4 |  |
| **I5** | 0.13 | 0.88 | 0.17 | 0.17 | 0.11 |  | 0.14 | 1.3 |  |
| **I6** | 0.14 | 0.87 |  | 0.20 |  | 0.12 |  | 1.2 |  |
| **I7** | 0.28 | 0.50 | 0.33 | 0.38 | 0.13 |  |  | 1.8 |  |
| **I8** | 0.24 | 0.45 | 0.48 | 0.36 |  |  | 0.24 | 2.4 | 2 |
| **I9** | 0.23 | 0.56 | 0.33 | 0.39 |  | 0.13 | 0.12 | 1.6 |  |
| **I10** |  | 0.22 | 0.21 | 0.20 |  |  |  | 1.6 | 1 |
| **I11** |  | 0.32 | 0.23 | 0.33 | 0.15 |  |  | 1.6 |  |
| **I12** | 0.26 | 0.16 |  | 0.21 | 0.31 |  | 0.66 | 2.2 | 2 |
| **I13** | 0.21 | 0.19 | 0.19 | 0.13 | 0.22 |  | 0.90 | 1.9 |  |
| **I14** | 0.27 | 0.23 |  | 0.19 | 0.28 | 0.13 | 0.65 | 2.3 | 2 |
| **I15** | 0.17 | 0.13 | 0.15 |  | 0.95 |  | 0.13 | 1.2 |  |
| **I16** | 0.22 | 0.11 | 0.20 |  | 0.70 |  | 0.35 | 1.2 |  |
| **I17** | 0.14 | 0.14 | 0.19 |  | 0.87 |  | 0.13 | 1.2 |  |
| **I18** | 0.28 | 0.24 | 0.48 | 0.33 | 0.14 | 0.20 |  | 3.3 | 2 |
| **I19** | 0.20 | 0.19 | 0.67 | 0.28 | 0.10 | 0.12 | 0.19 | 4.2 | 2 |
| **I20** | 0.20 | 0.23 | 0.57 | 0.25 | 0.20 | 0.25 |  | 3.3 | 2 |
| **I21** | 0.27 | 0.13 |  | 0.21 |  | 0.70 |  | 2.1 | 2 |
| **I22** | 0.14 | 0.11 | 0.39 | 0.11 |  | 0.80 | 0.12 | 1.5 |  |
| **I23** | 0.17 | 0.10 | 0.28 | 0.13 |  | 0.89 |  | 1.5 |  |
| **I24** | 0.48 | 0.17 | 0.11 | 0.37 |  |  | 0.14 | 3.6 | 2 |
| **I25** | 0.42 | 0.14 | 0.29 | 0.36 | 0.14 |  | 0.14 | 2.8 | 2 |
| **I26** | 0.32 | 0.19 | 0.20 | 0.40 | 0.21 |  |  | 3.0 | 2 |
| **I27** | 0.17 | 0.15 | 0.48 |  |  | 0.14 |  | 1.3 |  |
| **I28** | 0.18 | 0.13 | 0.38 | 0.17 |  |  |  | 1.6 |  |
| **I29** | 0.20 | 0.16 | 0.53 |  |  | 0.21 |  | 1.4 |  |
| **I30** | 0.17 | 0.14 | 0.25 | 0.28 |  |  |  | 1.4 | 1 |
| **I31** | 0.16 |  | 0.41 | 0.25 | 0.13 | 0.10 |  | 1.6 |  |
| **I32** | 0.13 |  | 0.43 | 0.18 |  | 0.14 |  | 1.4 |  |
| **I33** | -0.13 | 0.16 | 0.65 |  | 0.16 |  |  | 5.1 | 2 |
| **I34** | 0.35 |  | 0.16 | 0.12 |  |  |  | 2.5 | 2 |
| **I35** | 0.18 | 0.34 |  | 0.81 |  | 0.23 |  | 1.8 |  |
| **I36** | 0.12 | 0.29 | 0.24 | 0.80 |  | 0.16 | 0.14 | 1.9 |  |
| **I37** | 0.13 | 0.28 | 0.17 | 0.80 |  | 0.17 |  | 1.8 |  |
| **I38** | 0.48 | 0.32 | 0.13 | 0.33 | 0.13 |  | 0.14 | 3.1 | 2 |
| **I39** | 0.28 | 0.26 | 0.43 | 0.29 | 0.14 |  | 0.19 | 4.7 | 2 |
| **I40** | 0.36 | 0.33 | 0.16 | 0.41 | 0.15 |  |  | 3.0 | 2 |
| **I41** |  |  |  |  |  |  | 0.13 | 3.4 | 1 |
| **I42** | 0.70 | 0.13 | 0.11 | 0.14 | 0.13 | 0.21 |  | 1.5 |  |
| **I43** | 0.45 | 0.19 | 0.33 |  | 0.14 | 0.27 | 0.11 | 3.7 | 2 |
| **I44** | 0.65 | 0.18 | 0.22 | 0.15 | 0.15 | 0.26 |  | 2.0 | 2 |
| **I45** | 0.90 | 0.16 |  |  | 0.11 | 0.11 |  | 1.5 |  |
| **I46** | 0.84 | 0.17 | 0.12 |  | 0.13 |  |  | 1.7 |  |
| **I47** | 0.85 | 0.12 | 0.18 |  | 0.12 | 0.21 |  | 1.8 |  |
| **I48** | 0.15 |  | 0.54 |  |  |  |  | 2.0 | 2 |
| **I49** | 0.32 |  | 0.27 |  |  |  |  | 1.8 |  |
| **I50** | 0.33 |  | 0.26 | 0.25 | -0.14 |  |  | 1.7 |  |

Com: complexity; Exclusion criteria 1: factor loading<0.3; Exclusion criteria 2: Initial complexity>1.9.

**Table S3.** Standardizedfactor loading, communality and uniqueness extracted from rotated matrix of the final version of FMR instrument.

| **Item** | **Factor 1** | **Factor 2** | **Factor 3** | **Factor 4** | **Factor 5** | **Communality** | **Uniqueness** |
| --- | --- | --- | --- | --- | --- | --- | --- |
| **I1** | 0.70 | 0.22 | 0.07 | 0.04 | 0.24 | 0.60 | 0.40 |
| **I2** | 0.63 | 0.15 | 0.10 | 0.11 | 0.31 | 0.54 | 0.46 |
| **I3** | 0.63 | 0.13 | 0.08 | 0.08 | 0.28 | 0.51 | 0.49 |
| **I4** | 0.85 | 0.17 | 0.14 | 0.10 | -0.02 | 0.78 | 0.22 |
| **I5** | 0.85 | 0.13 | 0.17 | 0.16 | 0.04 | 0.79 | 0.21 |
| **I6** | 0.83 | 0.14 | 0.09 | 0.11 | 0.04 | 0.73 | 0.27 |
| **I7** | 0.63 | 0.24 | 0.21 | 0.17 | 0.24 | 0.58 | 0.42 |
| **I9** | 0.68 | 0.20 | 0.13 | 0.21 | 0.32 | 0.67 | 0.33 |
| **I11** | 0.42 | -0.03 | 0.15 | 0.07 | 0.33 | 0.31 | 0.69 |
| **I13** | 0.28 | 0.22 | 0.42 | 0.11 | 0.16 | 0.34 | 0.66 |
| **I15** | 0.15 | 0.12 | 0.94 | 0.05 | 0.09 | 0.93 | 0.07 |
| **I16** | 0.17 | 0.20 | 0.81 | 0.05 | 0.07 | 0.74 | 0.26 |
| **I17** | 0.15 | 0.11 | 0.88 | 0.07 | 0.10 | 0.83 | 0.17 |
| **I22** | 0.12 | 0.27 | 0.03 | 0.32 | 0.50 | 0.44 | 0.56 |
| **I23** | 0.12 | 0.29 | -0.03 | 0.28 | 0.48 | 0.41 | 0.59 |
| **I27** | 0.11 | 0.12 | 0.13 | 0.86 | 0.12 | 0.80 | 0.20 |
| **I28** | 0.20 | 0.12 | 0.03 | 0.62 | 0.18 | 0.47 | 0.53 |
| **I29** | 0.13 | 0.17 | 0.05 | 0.85 | 0.21 | 0.82 | 0.18 |
| **I31** | 0.12 | 0.12 | 0.15 | 0.20 | 0.49 | 0.34 | 0.66 |
| **I32** | 0.08 | 0.12 | 0.09 | 0.19 | 0.47 | 0.29 | 0.71 |
| **I35** | 0.54 | 0.17 | 0.08 | -0.06 | 0.59 | 0.67 | 0.33 |
| **I36** | 0.51 | 0.10 | 0.10 | 0.06 | 0.65 | 0.71 | 0.29 |
| **I37** | 0.51 | 0.10 | 0.10 | -0.02 | 0.64 | 0.70 | 0.30 |
| **I42** | 0.21 | 0.63 | 0.15 | 0.14 | 0.18 | 0.52 | 0.48 |
| **I45** | 0.18 | 0.91 | 0.15 | 0.10 | 0.06 | 0.89 | 0.11 |
| **I46** | 0.16 | 0.83 | 0.19 | 0.14 | 0.02 | 0.78 | 0.22 |
| **I47** | 0.15 | 0.88 | 0.18 | 0.13 | 0.18 | 0.87 | 0.13 |
| **I49** | 0.07 | 0.32 | 0.07 | 0.03 | 0.18 | 0.15 | 0.85 |
| **I50** | 0.16 | 0.32 | -0.07 | 0.03 | 0.23 | 0.19 | 0.81 |
